# Supplementary material
Source: PubMed Central journal article supplement (PMC7021006)
Supplement: PRO-29-686-s001.pdf [file PRO-29-686-s001.pdf]

**A structural determinant of mycophenolic acid resistance  
in eukaryotic inosine 5'-monophosphate dehydrogenases**

Rebecca Freedman<sup>2, §</sup>, Runhan Yu<sup>1, §</sup>, Alex Sarkis<sup>2</sup> and Lizbeth Hedstrom<sup>1,3,\*</sup>

**Supporting Information**

**Alignment S1. Alignment of MPA sensitive and resistant enzymes.** Residues that contact MPA are highlighted in yellow. Residue 267 (*Pb*IMPdHA numbering) is highlighted in cyan.

| Organism                          | Abbreviation | Sequence                   | Comments                                                                             |
|-----------------------------------|--------------|----------------------------|--------------------------------------------------------------------------------------|
| <i>Aspergillus nidulans</i>       | AnIMPdH      | AspGB An12478 <sup>a</sup> | MPA sensitive                                                                        |
| <i>Candida albicans</i>           | CaIMPdH      | UniProt O00086             | MPA sensitive                                                                        |
| <i>Cricetulus griseus</i>         | CgIMPdH      | UniProt G3GZ89             | MPA sensitive;<br>structure of E-XMP*MPA complex 1JR1                                |
| <i>Penicillium brevicompactum</i> | PbIMPdHA     | UniProt AEP94206.1         | MPA resistant; note:<br>partial coding<br>sequence missing N-<br>terminal MPITASDAAP |
| <i>Penicillium brevicompactum</i> | PbIMPdHB     | UniProt A0A0B5L585         | MPA resistant                                                                        |
| <i>P. rubens</i><br>Wisconsin     | PrIMPdHA     | UniProt B6HC24             | formerly <i>P. chrysenogenum</i> ; MPA sensitive                                     |
| <i>P. rubens</i><br>Wisconsin     | PrIMPdHB     | UniProt B6H451             | formerly <i>P. chrysenogenum</i> ; MPA sensitive                                     |
| <i>Saccharomyces cerevisiae</i>   | ScIMPdH2     | UniProt P38697             | MPA resistant                                                                        |
| <i>Saccharomyces cerevisiae</i>   | ScIMPdH3     | UniProt A7A1V2             | MPA sensitive                                                                        |
| <i>Saccharomyces cerevisiae</i>   | ScIMPdH4     | UniProt P50094             | MPA sensitive                                                                        |

a. AspGB: *Aspergillus* Genome Database

**Percent identity matrix**

|              |        |        |        |        |        |        |        |        |        |        |
|--------------|--------|--------|--------|--------|--------|--------|--------|--------|--------|--------|
| 1: CgIMPdH   | 100.00 | 60.59  | 59.79  | 61.66  | 61.39  | 59.18  | 64.61  | 64.08  | 62.73  | 61.13  |
| 2: PrIMPdHB  | 60.59  | 100.00 | 91.62  | 79.62  | 78.48  | 78.88  | 64.16  | 63.34  | 63.34  | 61.42  |
| 3: PbIMPdHB  | 59.79  | 91.62  | 100.00 | 80.23  | 79.28  | 79.88  | 62.50  | 63.03  | 62.84  | 61.49  |
| 4: AnIMPdH   | 61.66  | 79.62  | 80.23  | 100.00 | 89.17  | 87.50  | 64.30  | 63.93  | 62.72  | 60.99  |
| 5: PrIMPdHA  | 61.39  | 78.48  | 79.28  | 89.17  | 100.00 | 91.81  | 64.68  | 64.89  | 63.48  | 61.95  |
| 6: PbIMPdHA  | 59.18  | 78.88  | 79.88  | 87.50  | 91.81  | 100.00 | 62.89  | 63.69  | 62.26  | 62.06  |
| 7: CaIMPdH   | 64.61  | 64.16  | 62.50  | 64.30  | 64.68  | 62.89  | 100.00 | 75.43  | 74.28  | 71.98  |
| 8: ScIMPdH4  | 64.08  | 63.34  | 63.03  | 63.93  | 64.89  | 63.69  | 75.43  | 100.00 | 88.91  | 84.13  |
| 9: ScIMPdH3  | 62.73  | 63.34  | 62.84  | 62.72  | 63.48  | 62.26  | 74.28  | 88.91  | 100.00 | 92.54  |
| 10: ScIMPdH2 | 61.13  | 61.42  | 61.49  | 60.99  | 61.95  | 62.06  | 71.98  | 84.13  | 92.54  | 100.00 |

**CLUSTAL O(1.2.4) multiple sequence alignment**

|          |                                                               |     |
|----------|---------------------------------------------------------------|-----|
| CgIMPdH  | -----                                                         | 0   |
| PrIMPdHB | -----MVEVLDYTKALEVL-KEYP-GDGLHVDTLTLLSDSHGALTYNDFLIL          | 44  |
| PbIMPdHB | -----MVEILDYTKALEVL-KEYPSGDGLHVDTLTLLSDNHGALTYNDFLIL          | 45  |
| AnIMPdH  | MPIANGDA-LGRAMKAEFQDHTKALEVLEKEYPIKDGLDVTLLTLLSDKHGALTYNDFLIL | 59  |
| PrIMPdHA | MPITAGDAAPGAAMKAEITDYAKALEVV-KTYTTADGLDADTLTLLSDKHGALTYNDFLIL | 59  |
| PbIMPdHA | MPITASDAAPGAAMKAEITDYAKALEVV-ETYKTRDGLDVTLLTLLSDKHGALTYNDFLIL | 59  |
| CaIMPdH  | -----MVFETSKATSYL-KDYPKKGSLVQELIDSTNFGGLTYNDFLIL              | 43  |
| ScIMPdH4 | -----MSAAPLDYKKALEHL-KTYSSKDGSLVQELMDSTTRGGLTYNDFLVL          | 46  |
| ScIMPdH3 | -----MAAVRDYKTALEFA-KSLPRLDGSLVQELMDSKTRGGLTYNDFLVL           | 45  |
| ScIMPdH2 | -----MAAIRDYKTALDFT-KSLPRPDGSLVQELMDSKIRGGLTYNDFLIL           | 45  |
| CgIMPdH  | -----                                                         | 0   |
| PrIMPdHB | PGSITFPASDVSLQTKVTRRFTIKAPLLSSPMDTVTEHSMIAHMALLGGLGVIHNNCPPD  | 104 |
| PbIMPdHB | PGSITFSAADVSLDQTKVTRRFTIKAPLLSSPMDTVTEHNMAIHMALLGGLGVIHNNCPPD | 105 |
| AnIMPdH  | PGYIGFPASDVSLDTPVTKRVTLKAPLLSSPMDTVTEHNMAIHMALLGGLGVIHNNCSPE  | 119 |
| PrIMPdHA | PGYIGFPASDVSLDTPVTKRISLKTPLLSSPMDTVTEHNMAIHMALLGGLGVIHNNCSPE  | 119 |
| PbIMPdHA | PGYIGFPASDVSLDTPVTKRISLKTPLLSSPMDTVTEHNMAIHMALLGGLGVIHNNCSPE  | 119 |
| CaIMPdH  | PGLINFPSAVSLETKLTKKILTKSPFVSSPMDTVTEENMAIHMALLGGIGIHHNCTSE    | 103 |
| ScIMPdH4 | PGLVNFPSAVSLQTKLTKKITLNTPFVSSPMDTVTEADMAIYMALLGGIGIHHNCTPK    | 106 |

|          |                                                                     |     |
|----------|---------------------------------------------------------------------|-----|
| ScIMPDH3 | PGLVDFPSSEVSLQTKLTRNITLNTFPVSSPMDTVTESEMAIFMALLGGIGFIHNNCTPE        | 105 |
| ScIMPDH2 | PGLVDFASSEVSLQTKLTRNITLNIPLVSSPMDTVTESEMATFMALLGGIGFIHNNCTPE        | 105 |
| CgIMPDH  | -----GFSGIPITA-----                                                 | 9   |
| PrIMPDBH | EQAEMVRKVKRYENGFIDPPIVLSPETTVGEAKELKTKWGFGGFPVTE-----               | 152 |
| PbIMPDBH | DQAEMVRKVKRYENGFILDPVVLSPSTTVAEAKELKTKWVFGGFPVTGKTHYLSSEFGKLA       | 165 |
| AnIMPDH  | DQAEMVRKVKRYENGFILDPVVLSPRATVREAKELKAKWGFGGFPVTE-----               | 167 |
| PrIMPDA  | DQAEMVRKVKRYENGFILDPVVISPKATVGEVKELKAKWGFGGFPVTE-----               | 167 |
| PbIMPDA  | AQAEMVRKVKRYENGFILDPVVLSPQATVGEAKELKAKWGFGGFPVTE-----               | 167 |
| CaIMPDH  | EQAEMVRKVKRYENGFINDPVVISPEVTVGEVKKMGEVLGFTSFPVTE-----               | 151 |
| ScIMPDH4 | EQASMVKKVKMFENGFINSPIVISPTTTVGEVVMKRKFGFSGFPVTE-----                | 154 |
| ScIMPDH3 | DQADMVRRVKNYENGFINNPIVISPTTTVGEAKSMKERFGFSGFPVTE-----               | 153 |
| ScIMPDH2 | DQADMVRRVKNYENGFINNPIVISPTTTVGEAKSMKEYGFAFGFPVTT-----               | 153 |
|          | . * . : * : *                                                       |     |
| CgIMPDH  | -----TGTMGSKLVGIVTSRDIQFHNHE--DPVTAVMM--TDLVTAPAGTTLAEA             | 60  |
| PrIMPDBH | -----KGTLLSKLLGIVTSRDIQFHNHE--DPVTAVMM--TDLVTAPAGTTLAEA             | 199 |
| PbIMPDBH | SSDSFSLLEKGYLHSGKLLGIVTSRDIQFHNHE--DPVTAVMS--TELVTAPAGTTLAEA        | 221 |
| AnIMPDH  | -----NGTLRSKLVGIVSTRDIQFHNNLD--DSVTAIMS--TDLVTAPAGTTLAEA            | 214 |
| PrIMPDA  | -----NGTLKSKLVGMVTSRDIQFHNNLD--EPVTAVMA--TDLVTAPAGTTLAEA            | 214 |
| PbIMPDA  | -----NGTLRSKLVGMVTSRDIQFHNNLS--DPVTAIMA--TDLVTAPAGTTLAEA            | 214 |
| CaIMPDH  | -----NGKVGKLVGIIITSRDIQFHEDNK--SPVSEVMT--KDLVVGKKGISLTDG            | 198 |
| ScIMPDH4 | -----DGKCPGKLVGLVTSRDIQFLEDD--LVVSEVMT--KNPVTGIKGITLKEG             | 201 |
| ScIMPDH3 | -----DGKRNKLMGIVTSRDIQFVEDNS--LLVQDVMT--KNPVTGAQGITLSEG             | 200 |
| ScIMPDH2 | -----DGKRNKLVGIVTSRDIQFVEDNS--LLVQDVMT--KNPVTGAQGITLSEG             | 200 |
|          | * . * : * : * : * : * : * : * : * : * : * : * : * : *               |     |
| CgIMPDH  | NEILQRSKKGKLPVNDQDELVAIIARTDLKKNRDYPLASKDSH-KQLLCGAAVGTREDD         | 119 |
| PrIMPDBH | NEVLRSSKKGKLPVNDKGLSISLLSRSDLMKNIHYPPLASKLPS-KQLLCAAAISTHDAD        | 258 |
| PbIMPDBH | NEVLRSSKKGKLPVNDKGLLVSLLSRSDLMKNIHYPPLASKLPS-KQLLCAAAISTHDAD        | 280 |
| AnIMPDH  | NEVLRSSKKGKLPVNDENGLVSLLSRSDLMKNLHYPLASKLPASKQLICAAAIGTREED         | 274 |
| PrIMPDA  | NQVLRQSKKGKLPVNDANGNIVSLLSRSDLMKNLHYPLASKLPDSKQLICAAAIGTREED        | 274 |
| PbIMPDA  | NEVLRQSKKGKLPVNDASGNIVSLLSRSDLMKNLHYPLASKLPDSKQLICAAIGTREED         | 274 |
| CaIMPDH  | NELLRSSKKGKLPVDAEGLNLSLISRTDLQKNQDYPNASKSFHSKQLLCGAAIGTIDAD         | 258 |
| ScIMPDH4 | NEILKQTKKGLLIVDDNGNLVSMLSRADLMKNQNYPLASKSATTKQLLCGAAIGTIEAD         | 261 |
| ScIMPDH3 | NEILKKIKKGLLIVDDNGNLVSMLSRDLMKNNQNYPLASKSATTKQLLCGAAIGTIDAD         | 260 |
| ScIMPDH2 | NEILKKIKKGRLLVVDEKGNLVSMLSRDLMKNNQNYPLASKSANTKQLLCGAAIGTMDAD        | 260 |
|          | * : * : * : * : * : * : * : * : * : * : * : * : * : *               |     |
| CgIMPDH  | KYRLDLLTQAGADVIVL DSSQ GNSVYQIAMVHYIKQKYPHLQVIGGNVVTAQAQNLIDA       | 179 |
| PrIMPDBH | KVRLEKLVLDAGLDIVVV DSSQ GHSIFQIAMIKYIKQTFPDIIDVIGGNIVTREQAAALIAA    | 318 |
| PbIMPDBH | KVRLQKLVLDAGLDIVVV DSSQ GNSMYQIAMIKWIKSTFPDIDIAGNIVTREQAAALIAA      | 340 |
| AnIMPDH  | KHRLKLLVEAGLDIVIL DSSQ GNSMYQIEMIKYIKKTYPEIDVIGGNVVTRDQAAALIAA      | 334 |
| PrIMPDA  | KKRLQLLVEAGLDIVIL DSSQ GNSMYQIEMIKYIKKNMPEIDVIGGNVVTRDQAAALIAA      | 334 |
| PbIMPDA  | KRRLQLLVDAGLDIVIL DSSQ GNSMYQIEMIKYVKKELPQIDVIGGNVVTRDQAAALIAA      | 334 |
| CaIMPDH  | RERLDKLVLDAGLDVVVL DSSQ GSSVVFQNLMIKWIKEKYPELQVIAGNVVTRDQAAALIEA    | 318 |
| ScIMPDH4 | KERLRLLEAGLDVVIL DSSQ GNSVVFQNLMIKWIKEKTFPDLI IAGNVATREQAAALIAA     | 321 |
| ScIMPDH3 | KERLRLLEAGLDVVIL DSSQ GNSIFQNLMIKWIKEKTFPDLI IAGNVATREQAAALIAA      | 320 |
| ScIMPDH2 | KERLRLLVKAGLDVVIL DSSQ GNSIFELNMLKWKVESFPGLEVIAGNVVTRDQAAALIAA      | 320 |
|          | : * * * . * . * * * : * : * : * : * : * : * : * : * : * : * : * : * |     |
| CgIMPDH  | GVDGLRVGMGCGSICITQEVMACGRPQGTAVYKVAEYARRFGVPVIADGGIQTGVHVVKA        | 239 |
| PrIMPDBH | GADGLRIGMGSACSITQEVMAAGRPQAAAVRSVSAFAARFGVPTIADGGVQNLGHIVKG         | 378 |
| PbIMPDBH | GADGLRIGMGSACSITQEVMAVGRPQAASVRSVSAFAARFGVPTIADGGVQNLGHIVKG         | 400 |
| AnIMPDH  | GVDGLRIGMGSACSITQEVMAVGRPQALSRRVTFQFAARFGVPCIDGGIQNVGHIVKG          | 394 |
| PrIMPDA  | GVDGLRIGMGSACSITQEVMAVGRPQAASVRSVSAFAARFGVPCIDGGIQNVGHIVKG          | 394 |
| PbIMPDA  | GVDGLRIGMGSACSITQEVMAVGRPQAASVRSVSAFAARFGVPCIDGGVQNLGHIVKG          | 394 |
| CaIMPDH  | GADALRIGMGSACSITQEVMACGRPQGTAVYGVTEFANKFGVPCIDGGIGNIGHITKA          | 378 |
| ScIMPDH4 | GADGLRIGMGSACSITQEVMACGRPQGTAVYNVCQFANQFVPCIMADGGVQNIIGHITKA        | 381 |
| ScIMPDH3 | GADGLRIGMGSACSITQEVMACGRPQGTAVYNVCEFANQFVPCIMADGGVQNIIGHITKA        | 380 |
| ScIMPDH2 | GADGLRIGMGTGSICITQEVMACGRPQGTAVYNVCEFANQFVPCIMADGGVQNIIGHITKA       | 380 |
|          | * . * . * : * * * * * * * * * * * : * * : * : * : * : * : * : * : * |     |

|          |                                                             |     |
|----------|-------------------------------------------------------------|-----|
| CgIMPDH  | LALGASTVMMGSLLAATTEAPGEYFFS-DGVRLLKRYRGMGSLDAMEKSS-----     | 287 |
| PrIMPDHB | LALGASAVMMGSLLAGTTESPGYFMSSEGQLVKAFRGMGSIAVMEDKSKSGAGN----- | 433 |
| PbIMPDHB | LALGASAVMMGSLLAGTTESPGYFVSNEGQLVKAFRGMGSIAVMEDKSKSGGGK----- | 455 |
| AnIMPDH  | LAMGATTVMMGSLLAGTTESPGYFVSNEGQLVKAYRGMGSIAAMEDKKAGNGKDSKAS  | 454 |
| PrIMPDHA | LAMGASTIMMGSLLAGTTESPGYFVSNEGQLVKAYRGMGSIAAMEDKKAGGDGKDSKAS | 454 |
| PbIMPDHA | LAMGASTVMMGSLLAGTTESPGYFVSNEGQLVKAYRGMGSIAAMEDKKAGNGAKDSKAS | 454 |
| CaIMPDH  | LALGASCVMMGSLLAGTAETPGDYFYR-DGKRLKTYRGMGSIDAMQQTNTNA-----   | 429 |
| ScIMPDH4 | LALGSSTVMMGMLAGTTESPGYFYK-DGKRLKAYRGMGSIDAMQKTGNKG-----     | 432 |
| ScIMPDH3 | LALGSSTVMMGMLAGTTESPGYFYQ-DGKRLKAYRGMGSIDAMQKTGTGK-----     | 431 |
| ScIMPDH2 | LALGSSTVMMGMLAGTTESPGYFYQ-DGKRLKAYRGMGSIDAMQKTGTGK-----     | 431 |
|          | **::: :***.:***.***:***:**: * * :*****: .*..                |     |

|          |                                                              |     |
|----------|--------------------------------------------------------------|-----|
| CgIMPDH  | -SSQKRYFSEGDVKVIAQGVSGSIQDKGSIQKFPYLIAGIQHGCQDIGAQSLSVLRSM   | 346 |
| PrIMPDHB | NAGASRYFSENDKVKVAQGVAGSVIDRGSITQYVPLYVAGVQHSLODIGVQNLDAIRDGV | 493 |
| PbIMPDHB | NAGASRYFSENDKVKVAQGVAGSVVDRGSITQYVPLYVAGVQHSLODIGVQDLALHNGV  | 515 |
| AnIMPDH  | NAGTARYFSEKDRVLVAQGVAGSVLDRGSVTKFVPLYVAGVQHSLODIGVSLQQLHEGV  | 514 |
| PrIMPDHA | NAGTARYFSEKDRVLVAQGVAGSVLDRGSVTKFVPLYVAGVQHSLODIGVKSADLHDGV  | 514 |
| PbIMPDHA | NAGTARYFSEKSNVLVAQGVAGSVLDRGSVTKFIPYLVAGVQHSLODIGVPSLSAMHAGV | 514 |
| CaIMPDH  | NASTSRYFSEADKVLVAQGVSGSVVDKGSITKFPYLYNGLQHSLODIGIKSIDELRENV  | 489 |
| ScIMPDH4 | NASTSRYFSESDSVLVAQGVSGAVVDKGSIKKFIPLYLYNGLQHSQDIGCESLTLKENV  | 492 |
| ScIMPDH3 | NASTSRYFSESDSVLVAQGVSGAVVDKGSIKKFIPLYLYNGLQHSQDIGYKSLTLKENV  | 491 |
| ScIMPDH2 | NASTSRYFSESDSVLVAQGVSGAVVDKGSIKKFIPLYLYNGLQHSQDIGCRSLTLKNNV  | 491 |
|          | :. ***** . * :***:*:: **:::*** *:* . **** .: :: :            |     |

|          |                                    |     |
|----------|------------------------------------|-----|
| CgIMPDH  | YSGELKFKEKRTMSAQIEGGVHGLHSYEKRLY-- | 377 |
| PrIMPDHB | NNGTVRFEMRSASAQTEGNVHGLHTHEKKLYS-  | 525 |
| PbIMPDHB | NNGQVRFEMRSASAQTEGNVHGLHSHEKKLYSS  | 548 |
| AnIMPDH  | NNGTVRFEVRSASAMAEGNVHGLHSYDKKLYS*  | 546 |
| PrIMPDHA | NKGTVRFEMRSASAMTEGNVHGLHSYDKKLYS-  | 546 |
| PbIMPDHA | DNGTVRFEMRSASAMTEGNVHGL-----       | 537 |
| CaIMPDH  | DNGEIRFEFRTASAQFEGGVHGLHSYEKRLHN-  | 521 |
| ScIMPDH4 | QNGEVRFEFRTASAQLEGGVHNLHSYEKRLYN-  | 524 |
| ScIMPDH3 | QSGKVRFEFRTASAQLEGGVHNLHSYEKRLHN-  | 523 |
| ScIMPDH2 | QRGKVRFEFRTASAQLEGGVHNLHSYEKRLHN-  | 523 |
|          | * :*** *: ** **.*.*                |     |

**Alignment S1. Alignment of Aspergillus IMPDHs.** Residue 267 (*Pb*IMPDA numbering) is highlighted in yellow.

| Species                             | IMPDH sequence | Comment                                                                            |
|-------------------------------------|----------------|------------------------------------------------------------------------------------|
| <i>Aspergillus aculeatinus</i>      | XP_025509000.1 |                                                                                    |
| <i>Aspergillus bombycis</i>         | XP_022386829.1 |                                                                                    |
| <i>Aspergillus brunneoviolaceus</i> | XP_025436855.1 |                                                                                    |
| <i>Aspergillus campestris</i>       | XP_024695056.1 |                                                                                    |
| <i>Aspergillus candidus</i>         | XP_024671855.1 | Silage (1); optimal temperature 20-24 C (1)                                        |
| <i>Aspergillus clavatus</i>         | XP_001272822.1 | Wheat silage (1); optimal temperature 24-25 C (1)                                  |
| <i>Aspergillus eucalypticola</i>    | XP_025391094.1 |                                                                                    |
| <i>Aspergillus fischeri</i>         | XP_001265922.1 |                                                                                    |
| <i>Aspergillus fumigatus</i>        | XP_749494.1    | Corn silage (2) ; optimal temperature 37 C (1)                                     |
| <i>Aspergillus glaucus</i>          | XP_022403647.1 | Pioneer species in grain silage (1); optimal temperature 24-25 C (1)               |
| <i>Aspergillus heteromorphus</i>    | XP_025403602.1 |                                                                                    |
| <i>Aspergillus homomorphus</i>      | XP_025550436.1 |                                                                                    |
| <i>Aspergillus ibericus</i>         | XP_025572109.1 |                                                                                    |
| <i>Aspergillus japonicus</i>        | XP_025522930.1 |                                                                                    |
| <i>Aspergillus lacticoffeatus</i>   | XP_025451440.1 |                                                                                    |
| <i>Aspergillus neoniger</i>         | XP_025478868.1 |                                                                                    |
| <i>Aspergillus niger</i>            | XP_001391892.2 | Wheat silage (1); optimal temperature 35-37 C (1)                                  |
| <i>Aspergillus nomius</i>           | XP_015408913.1 |                                                                                    |
| <i>Aspergillus novofumigatus</i>    | XP_024686877.1 |                                                                                    |
| <i>Aspergillus oryzae</i>           | XP_001823965.1 | Corn silage (3); optimal temperature 35-37 C (1)                                   |
| <i>Aspergillus piperis</i>          | XP_025510507.1 |                                                                                    |
| <i>Aspergillus saccharolyticus</i>  | XP_025435086.1 |                                                                                    |
| <i>Aspergillus sclerotionige</i>    | XP_025464902.1 |                                                                                    |
| <i>Aspergillus steynii</i>          | XP_024700898.1 | Does not grow at 37 C (4)                                                          |
| <i>Aspergillus terreus</i>          | XP_001218150.1 | Silage (1; 2)                                                                      |
| <i>Aspergillus uvarum</i>           | XP_025490880.1 |                                                                                    |
| <i>Aspergillus vadensis</i>         | XP_025560215.1 |                                                                                    |
| <i>Penicillioopsis zonata</i>       | XP_022581501.1 | formerly <i>A. zonata</i> ; optimal temperature 24-25 C (ATCC 16867 product sheet) |

## References

1. Panasenko VT (1967) Ecology of microfungi. Bot Rev 33:189-215.
2. Wambacq E, Vanhoutte I, Audenaert K, De Gelder L, Haesaert G (2016) Occurrence, prevention and remediation of toxigenic fungi and mycotoxins in silage: a review. J Sci Food Agric 96:2284-2302. PMID: 26676761 {Medline}
3. Zulkifli NA, Zakaria L (2017) Morphological and Molecular Diversity of *Aspergillus* From Corn Grain Used as Livestock Feed. HAYATI Journal of Biosciences 24:26-34.
4. Frisvad JC, Frank JM, Houbraken JAMP, Kuijpers AFA, Samson RA (2004) New ochratoxin A producing species of *Aspergillus* section *Circumdati*. Stud Mycol 50:23-43.



CLUSTAL O(1.2.4) multiple sequence alignment

```

XP_022581501.1 -----MKAEIQDHTKALEVL-KEYKTQDGLDVDTLLDSDKHGALTYNDFLILP 47
XP_024695056.1 MPISKGDSLGMAMPAEIQDYSKALDVLEKDYSSRDGLDVDTLLDSDKHGALTYNDFLILP 60
XP_024671855.1 MPISKGDSLGMAMPAEIQDYSKALDVLEKDYSSRDGLDVDTLLDSDKHGALTYNDFLILP 60
XP_022403647.1 MTLGQGDNQGLAMKAEIQDYSKALDVLEKDYPTRDGLDVDTLLDSDKHGALTYNDFLILP 60
XP_025403602.1 MPIANGDSLGRAMKAEIQDHTKALEVLEKDYQTRDGLDVDTLLDSDKHGALTYNDFLILP 60
XP_025435086.1 MTFANGDIPGPAMKAEIQDYTKALEVLKNEYKVS DGLDVDTLLDSDKHGALTYNDFLILP 60
XP_025550436.1 MTFANGDIPGPAMKAEIQDYTKALEVLKQEYTTSDGLDVDTLLDSDKHGALTYNDFLILP 60
XP_025436855.1 MTFANGDIPGPAMKAEIQDYTKALEVLQKEYTTSDGLDIDTLLDSDKHGALTYNDFLILP 60
XP_025509000.1 MTFANGDIPGPAMKAEIQDYTKALEVLQKEYTTSDGLDIDTLLDSDKHGALTYNDFLILP 60
XP_025490880.1 ----- 0
XP_025522930.1 MTFANGDIPGPAMKAEIQDYTKALEVLQKEYTTSDGLDVDTLLDSDKHGALTYNDFLILP 60
XP_025451440.1 ----- 0
XP_001391892.2 MPISNGDSLGRAMQAEIQDHTKALEVL-KTYTTQDGLDVDTLLDSDKHGALTYNDFLILP 59
XP_025560215.1 ----- 0
XP_025391094.1 MPISNGDSLGRAMQAEIQDHTKALEVL-KTYTTQDGLDVDTLLDSDKHGALTYNDFLILP 59
XP_025510507.1 MPISNGDSLGRAMQAEIQDHTKALEVL-KTYTTQDGLDVDTLLDSDKHGALTYNDFLILP 59
XP_025478868.1 ----- 0
XP_025464902.1 ----- 0
XP_025572109.1 MPISNGDSLGRAMQAEIQDHTKALEVLAQEYTTGDGLDIDTLLDSDKHGALTYNDFLILP 60
XP_024700898.1 MPISNGDALGRAMKAEIQDHTKALEVLEKEYPSRDGLDVDTLLDSDKHGALTYNDFLILP 60
XP_001218150.1 MPISNGDSLGRAMHAEIQDYTKALEVLEKDYTTDRDGLDVDTLLDSDKHGALTYNDFLILP 60
XP_001823965.1 MPISNGDALGRAMKAEIEDHTKALEVLEKDYTTDRDGLDVDTLLDSDKHGALTYNDFLILP 60
XP_022386829.1 MPISNGDALGRAMKAEIQDHTKALEVLEKDYTSRDGLDVDTLLDSDKHGALTYNDFLILP 60
XP_015408913.1 MPISNGDALGRAMKAEIQDHTKALEVLEKDYTSRDGLDVDTLLDSDKHGALTYNDFLILP 60
XP_001272822.1 MPIANGDALGRAMKAEIQDHTKALEVLEKEYSTRDGLDVDTLLDSDKHGALTYNDFLILP 60
XP_749494.1 MPIANGDSLGCAMKADIQDYTKALEILEKEYTTDRDGLDVDTLLDSDKHGALTYNDFLILP 60
XP_024686877.1 MPIANRDSLGRAMKAEIQDYTKALEVLEKEYTTDRDGLDVDTLLDSDKHGALTYNDFLILP 60
XP_001265922.1 MPIANGDSLGRAMKAEIQDHTKALEVLEKEYTTDRDGLDVDTLLDSDKHGALTYNDFLILP 60

XP_022581501.1 GYIGFAASEIALDSPITKRITLKPAPLVSSPMDTVTEHNMAIHMALLGGLGVIHHCSPED 107
XP_024695056.1 GYIGFPASDVVLDTPVTKRVTLKTPLVSSPMDTVTEHNMAIHMALLGGLGVIHHCSPDE 120
XP_024671855.1 GYIGFPASDVVLDTPVTKRVTLKTPLVSSPMDTVTEHNMAIHMALLGGLGVIHHCSPDE 120
XP_022403647.1 GHVGFASDVTLDTVPVTKRITLKPAPLVSSPMDTVTEHNMAIHMALLGGLGVIHHCSPAED 120
XP_025403602.1 GYIGFPASDVTLDTVPVTKRVSLKVPLVSSPMDTVTEHNMAIHMALLGGLGVIHHCSPEDA 120
XP_025435086.1 GYIGFPASDVTLDTAVTKRVSLKVPLVSSPMDTVTEHNMAIHMALLGGLGVIHHCSPQD 120
XP_025550436.1 GYIGFPASDVTLDTAVTKRVSLKVPLVSSPMDTVTEHNMAIHMALLGGLGVIHHCSPQD 120
XP_025436855.1 GYIGFPASDVTLDTAVTKRVSLKVPLVSSPMDTVTEHNMAIHMALLGGLGVIHHCSPQD 120
XP_025509000.1 GYIGFPASDVTLDTAVTKRVSLKVPLVSSPMDTVTEHNMAIHMALLGGLGVIHHCSPQD 120
XP_025490880.1 -----MDTVTEHNMAIHMALLGGLGVIHHCSPQD 30
XP_025522930.1 GYIGFPASDVTLDTAVTKRVSLKVPLVSSPMDTVTEHNMAIHMALLGGLGVIHHCSPQD 120
XP_025451440.1 -----MDTVTEHNMAIHMALLGGLGVIHHCSPAEE 30
XP_001391892.2 GYIGFPASDVTLDTVPVTKRVSLKVPLVSSPMDTVTEHNMAIHMALLGGLGVIHHCSPAEE 119
XP_025560215.1 -----MDTVTEHNMAIHMALLGGLGVIHHCSPAEE 30
XP_025391094.1 GYIGFPASDVTLDTVPVTKRVSLKVPLVSSPMDTVTEHNMAIHMALLGGLGVIHHCSPAEE 119
XP_025510507.1 GYIGFPASDVTLDTVPVTKRVSLKVPLVSSPMDTVTEHNMAIHMALLGGLGVIHHCSPAEE 119
XP_025478868.1 -----MDTVTEHNMAIHMALLGGLGVIHHCSPAEE 30
XP_025464902.1 -MTGFASDVSLDTPVTKRVSLKVPLVSSPMDTVTEHNMAIHMALLGGLGVIHHCSPAEE 59
XP_025572109.1 GYIGFPASDVSLDTPVTKRVSLKVPLVSSPMDTVTEHNMAIHMALLGGLGVIHHCSPAEE 120
XP_024700898.1 GYIGFPASDVSLDTPVTKRIGLKAPLVSSPMDTVTEHNMAIHMALLGGLGVIHHCSPAED 120
XP_001218150.1 GYIGFPASEVTLDTVPVTKRVSLKAPLVSSPMDTVTEHNMAIHMALLGGLGVIHHCSPAEE 120
XP_001823965.1 GYIGFPASDVTLDTVPVTKRVSLKAPLVSSPMDTVTEHNMAIHMALLGGLGVIHHCSPAED 120
XP_022386829.1 GYIGFPASDVTLDTVPVTKRVSLKAPLVSSPMDTVTEHNMAIHMALLGGLGVIHHCSPAED 120
XP_015408913.1 GYIGFPASDVTLDTVPVTKRVSLKAPLVSSPMDTVTEHNMAIHMALLGGLGVIHHCSPAED 120
XP_001272822.1 GYIGFAASDVSLDTPVTKRVSLKVPLVSSPMDTVTEHNMAIHMALLGGLGVIHHCSPAED 120
XP_749494.1 GYIGFPASDVTLDTVPVTKRVSLKVPLVSSPMDTVTEHNMAIHMALLGGLGVIHHCSPAED 120
XP_024686877.1 GYIGFPASDVTLDTVPVTKRVSLKVPLVSSPMDTVTEHNMAIHMALLGGLGVIHHCSPAED 120
XP_001265922.1 GYIGFPASDVTLDTVPVTKRVSLKVPLVSSPMDTVTEHNMAIHMALLGGLGVIHHCSPAED 120
*****:*****:

XP_022581501.1 QAEMVRKVKRYENGFISDPVVLSPATVADAKELKAKWGGFVPTENGLRSLKLIIT 167

```

|                |                                                             |     |
|----------------|-------------------------------------------------------------|-----|
| XP_024695056.1 | QAEMVRKVKRYENGFILDPVVLAPTATVGEAKELKAKWFGGFPVTENGLRSKIIGMVT  | 180 |
| XP_024671855.1 | QAEMVRKVKRYENGFILDPVVLAPTATVGEAKELKAKWFGGFPVTENGLRSKIIGMVT  | 180 |
| XP_022403647.1 | QAEMVRKVKRYENGFILDPVVLSPNATVGEAKDLKARWFGGFPVTENGLRSLKLVGMVT | 180 |
| XP_025403602.1 | QAEMVRKVKRYENGFILDPVVLSPKATVAEAKELKAKWFGGFPVTENGLRSLKLVGIVT | 180 |
| XP_025435086.1 | QAEMVRKVKRYENGFILDPVVLAPTATVREAKELKAKWFGGFPVTENGLRSLKLVGMVT | 180 |
| XP_025550436.1 | QAEMVRKVKRYENGFILDPVVLAPTATVREAKELKAKWFGGFPVTENGLRSLKLVGMVT | 180 |
| XP_025436855.1 | QAEMVRKVKRYENGFILDPVVLSPATVREAKELKAKWFGGFPVTENGLRSLKLVGMVT  | 180 |
| XP_025509000.1 | QAEMVRKVKRYENGFILDPVVLSPATVREAKELKAKWFGGFPVTENGLRSLKLVGMVT  | 180 |
| XP_025490880.1 | QAEMVRKVKRYENGFILDPVVLSPATVQEAELKAKWFGGFPVTENGLRSLKLVGMVT   | 90  |
| XP_025522930.1 | QAEMVRKVKRYENGFILDPVVLSPATVQEAELKAKWFGGFPVTENGLRSLKLVGMVT   | 180 |
| XP_025451440.1 | QAEMVRKVKRYENGFISDPVVLSPKATVREAKELKAKWFGGFPVTENGLRSLKLVGIVT | 90  |
| XP_001391892.2 | QAEMVRKVKRYENGFISDPVVLSPKATVREAKELKAKWFGGFPVTENGLRSLKLVGIVT | 179 |
| XP_025560215.1 | QAEMVRKVKRYENGFISDPVVLSPKASVREAKELKAKWFGGFPVTENGLRSLKLVGIVT | 90  |
| XP_025391094.1 | QAEMVRKVKRYENGFISDPVVLSPKATVREAKELKAKWFGGFPVTENGLRSLKLVGIVT | 179 |
| XP_025510507.1 | QAEMVRKVKRYENGFISDPVVLSPKATVREAKELKAKWFGGFPVTENGLRSLKLVGIVT | 179 |
| XP_025478868.1 | QAEMVRKVKRYENGFISDPVVLSPKATVREAKELKAKWFGGFPVTENGLRSLKLVGIVT | 90  |
| XP_025464902.1 | QAEMVRKVKRYENGFISDPVVLSPKATVSEAKELKAKWFGGFPVTENGLRSLKLVGIVT | 119 |
| XP_025572109.1 | QAEMVRKVKRYENGFISDPVVLSPKATVSEAKELKAKWFGGFPVTENGLRSLKLVGIVT | 180 |
| XP_024700898.1 | QAEMVRKVKRYENGFILDPVVLSPSATVGEAKDLKTKWFGGFPVTENGLRSLKLVGMVT | 180 |
| XP_001218150.1 | QAEMVRKVKRYENGFILDPVVLSPKATVGEAKDLKAKWFGGFPVTENGLRSLKLVGMVT | 180 |
| XP_001823965.1 | QAEMVRKVKRYENGFILDPVVLSPKATVGEAKELKSKWFGGFPVTESGNLRSKLVGIVT | 180 |
| XP_022386829.1 | QAEMVRKVKRYENGFILDPVVLSPNATVGEAKELKSKWFGGFPVTESGNLRSKLVGIVT | 180 |
| XP_015408913.1 | QAEMVRKVKRYENGFILDPVVLSPKATVGEAKELKSTWFGGFPVTESGNLRSKLVGIVT | 180 |
| XP_001272822.1 | QAEMVRKVKRYENGFILDPVVLSPKATVGEAKELKAQWFGGFPVTENGLRSLKLVGMVT | 180 |
| XP_749494.1    | QAEMVRKVKRYENGFILDPVVLSPKATVGEAKALKAKWFGGFPVTENGLRSLKLVGMVT | 180 |
| XP_024686877.1 | QAEMVRKVKRYENGFILDPVVLSPKATVGEAKELKAKWFGGFPVTENGLRSLKLVGMVT | 180 |
| XP_001265922.1 | QAEMVRKVKRYENGFILDPVVLSPKATVGEAKELKAKWFGGFPVTENGLRSLKLVGMVT | 180 |

\*\*\*\*\*:\*.\*:\*:\*\* \*\*:\*:\*\*\*\*\*.\*.\*\*\*\*\*:\*\*\*:\*

|                |                                                                |     |
|----------------|----------------------------------------------------------------|-----|
| XP_022581501.1 | TRDIQFHPNPEDPVTAVMATDLVTAPAGTTLAEANDVLRSSKKGKLPIDVDEGNLISLLS   | 227 |
| XP_024695056.1 | SRDIQFHNNSSDPVTNVMSTDLITAPAGTTLAEANDVLRSSKKGKLPVDDNGNIVSLLS    | 240 |
| XP_024671855.1 | SRDIQFHNNSSDPVTNVMSTDLITAPAGTTLAEANDVLRSSKKGKLPVDDNGNIVSLLS    | 240 |
| XP_022403647.1 | SRDIQFHPSLDDPVTAIMATDLVTAPAGTTLAEANDVLRSSKKGKLPIDVDEGNLISLLS   | 240 |
| XP_025403602.1 | SRDIQFHNGEDSVTAIMSTDLVTAPAGTTLAEANDVLRSSKKGKLPIDVDEGNLISLLS    | 240 |
| XP_025435086.1 | SRDIQFHRLDLDAPVTAIMSTDLVTAPAGTTLAEANEVLRSSKKGKLPIDVDEGNLISLLS  | 240 |
| XP_025550436.1 | TRDIQFHCDLDDPVTAIMSTDLVTAPAGTTLAEANEVLRSSKKGKLPIDVDEGNLISLLS   | 240 |
| XP_025436855.1 | SRDIQFHRLDLDAPVTAIMSTDLVTAPAGTTLAEANEVLRSSKKGKLPIDVTNGNLVSLLS  | 240 |
| XP_025509000.1 | SRDIQFHRLDLDAPVTAIMSTDLVTAPAGTTLAEANEVLRSSKKGKLPIDVTNGNLVSLLS  | 240 |
| XP_025490880.1 | SRDIQFHRLDLDAPVTAIMSTDLVTAPAGTTLAEANEVLRSSKKGKLPIDVTNGNLVSLLS  | 150 |
| XP_025522930.1 | SRDIQFHRLDLDAPVTAIMSTDLVTAPAGTTLAEANEVLRSSKKGKLPIDVTNGNLVSLLS  | 240 |
| XP_025451440.1 | SRDIQFHHDLDSDSVTAIMSTDLVTAPAGTTLAEANEVLRSSKKGKLPIDVDEGNLISLLS  | 150 |
| XP_001391892.2 | SRDIQFHHDLDSDSVTAIMSTDLVTAPAGTTLAEANEVLRSSKKGKLPIDVDEGNLISLLS  | 239 |
| XP_025560215.1 | SRDIQFHGDLDDSVTAIMSTDLITAPAGTTLAEANEVLRSSKKGKLPIDVDEGNLISLLS   | 150 |
| XP_025391094.1 | SRDIQFHRLDLDSDSVTAIMSTDLITAPAGTTLAEANEVLRSSKKGKLPIDVDEGNLISLLS | 239 |
| XP_025510507.1 | SRDIQFHRLDLDSDSVTAIMSTDLITAPAGTTLAEANEVLRSSKKGKLPIDVDEGNLISLLS | 239 |
| XP_025478868.1 | SRDIQFHRLDLDSDSVTAIMSTDLITAPAGTTLAEANEVLRSSKKGKLPIDVDEGNLISLLS | 150 |
| XP_025464902.1 | SRDIQFHNNVNDPVTAIMSTDLVTAPAGTTLAEANEVLRSSKKGKLPIDVDEGNLISLLS   | 179 |
| XP_025572109.1 | SRDIQFHNNLEDPTVIMSTDLVTAPAGTTLAEANEVLRSSKKGKLPIDVDEGNLISLLS    | 240 |
| XP_024700898.1 | SRDIQFHHLKDDPVTAIMATDLVTAPAGTTLAEANEVLRSSKKGKLPIDVDEGNLISLLS   | 240 |
| XP_001218150.1 | SRDIQFHHPNLDDPVTAIMTDLVTAPAGTTLAEANEVLRSSKKGKLPIDVDEGNLISLLS   | 240 |
| XP_001823965.1 | SRDIQFHHPNLEDPTVIMSTDLVTAPAGTTLAEANEVLRSSKKGKLPIDVDEGNLISLLS   | 240 |
| XP_022386829.1 | SRDIQFHHPKPEDPVTAIMSTDLVTAPAGTTLAEANEVLRSSKKGKLPIDVDEGNLISLLS  | 240 |
| XP_015408913.1 | SRDIQFHHPNLDDPVTAIMSTDLVTAPAGTTLAEANEVLRSSKKGKLPIDVDEGNLISLLS  | 240 |
| XP_001272822.1 | SRDIQFYPNLDDPVTAIMSTDLVTAPAGTTLAEANNVLRSSKKGKLPIDVDEGNLISLLS   | 240 |
| XP_749494.1    | SRDIQFHTNLDDPVTAIMSTDLVTAPAGTTLAEANDVLRSSKKGKLPIDVDEGNLISLLS   | 240 |
| XP_024686877.1 | SRDIQFHTNLNDPVTAIMSTDLVTAPAGTTLAEANNVLRSSKKGKLPIDVDEGNLISLLS   | 240 |
| XP_001265922.1 | SRDIQFHTNLNDPVTAIMSTDLVTAPAGTTLAEANNVLRSSKKGKLPIDVDEGNLISLLS   | 240 |

:\*\*\*\*\*: . . \*\* :\*:\*\*\*:\*\*\*\*\*:\*\*\*\*\*:\*\*\*\*\*:\*. \*.:\*:\*\*\*\*\*

|                |                                                              |     |
|----------------|--------------------------------------------------------------|-----|
| XP_022581501.1 | RSDLMKNLHYPLASKLPDSKQLICAASIGTRDEDKHLRQLLVNAGLDIVILDSSQGNISY | 287 |
| XP_024695056.1 | RSDLMKNLHYPLASKLPQSKQLICAAIGTREEDKSRKLLVEAGLDIVVLDSSQGNISY   | 300 |
| XP_024671855.1 | RSDLMKNLHYPLASKLPQSKQLICAAIGTREEDKSRKLLVEAGLDIVVLDSSQGNISY   | 300 |
| XP_022403647.1 | RSDLMKNLHYPLASKLPQSKQLVCSATIGTREEDKTRLKLLVEAGLDIVILDSSQGNISY | 300 |
| XP_025403602.1 | RSDLMKNLHYPLASKLPQSKQLICAASIGTREEDKTRLRLVVEAGLDIVILDSSQGNISY | 300 |





|                |                                                                                        |     |
|----------------|----------------------------------------------------------------------------------------|-----|
| XP_025490880.1 | QAASVRSVSNFAARFGVPCIADGGVQNVGHIVKGLAMGASTVMMGGLLAGTTESPGGEYFV                          | 330 |
| XP_025522930.1 | QAASVRSVSNFAARFGVPCIADGGVQNVGHIVKGLAMGASTVMMGGLLAGTTESPGGEYFV                          | 420 |
| XP_025451440.1 | QAI AVR SVTAF AARFGVPCIADGGVQNVGHIVKGLAMGASTVMMGGLLAGTTESPGGEYFM                       | 330 |
| XP_001391892.2 | QAI AVR SVTAF AARFGVPCIADGGVQNVGHIVKGLAMGASTVMMGGLLAGTTESPGGEYFM                       | 419 |
| XP_025560215.1 | QAI AVR SVTAF AARFGVPCIADGGVQNVGHIVKGLAMGASTVMMGGLLAGTTESPGGEYFM                       | 330 |
| XP_025391094.1 | QAI AVR SVTAF AARFGVPCIADGGI QNVGHIVKGLAMGASTVMMGGLLAGTTESPGGEYFM                      | 419 |
| XP_025510507.1 | QAI AVR SVTAF AARFGVPCIADGGVQNVGHIVKGLAMGASTVMMGGLLAGTTESPGGEYFM                       | 419 |
| XP_025478868.1 | QAI AVR SVTAF AARFGVPCIADGGVQNVGHIVKGLAMGASTVMMGGLLAGTTESPGGEYFM                       | 330 |
| XP_025464902.1 | QAAAVRSVTSFAARFGVPCIADGGIQNIGHIVKGLAAGASTVMMGGLLAGTTESPGGEYFV                          | 359 |
| XP_025572109.1 | QAAAVRSVTSFAARFGVPCIADGGIQNIGHIVKGLAAGASTVMMGGLLAGTTESPGGEYFV                          | 420 |
| XP_024700898.1 | QAASVRSVSSFAARFGVPCIADGGVQNVGHIVKGLAMGASTVMMGGLLAGTTESPGGEYFV                          | 420 |
| XP_001218150.1 | QAAAVRSVTSFASRFGVPCIADGGIQNIGHIVKGLAMGASTIMMGGLLAGTTESPGGEYFV                          | 420 |
| XP_001823965.1 | QAI SVRSVSSFAARFGVPTIADGGVQNVGHIVKGLAMGASTVMMGGLLAGTTESPGGEYFV                         | 420 |
| XP_022386829.1 | QAI SVRSVSSFAARFGVPTIADGGVQNVGHIVKGLAMGASTVMMGGLLAGTTESPGGEYFV                         | 420 |
| XP_015408913.1 | QAI SVRSVSSFAARFGVPTIADGGVQNVGHIVKGLAMGASTVMMGGLLAGTTESPGGEYFV                         | 420 |
| XP_001272822.1 | QAVAVRSVASFAARFGVPCIADGGVQNVGHIVKGLAMGASTVMMGGLLAGTTESPGGEYFV                          | 420 |
| XP_749494.1    | QAVAVRSVASFAARFGVPCIADGGIQNVGHIVKGLAMGASTVMMGGLLAGTTESPGGEYFV                          | 420 |
| XP_024686877.1 | QAVAVRSVASFAARFGVPCIADGGIQNVGHIVKGLAMGASTVMMGGLLAGTTESPGGEYFV                          | 420 |
| XP_001265922.1 | QAVAVRSVAFAARFGVPCIADGGIQNVGHIVKGLAMGASTVMMGGLLAGTTESPGGEYFV                           | 420 |
|                | ** : ** * : ** : ***** ***** : ** : ***** ***** : ***** :                              |     |
| XP_022581501.1 | SSEGQLVKAYRGMGSI AAMEDKKAGGKSKASNAGTARYFSEKDRVLVAQGVAGSVLD                             | 467 |
| XP_024695056.1 | SNEGQLVKAYRGMGSI AAMEDKKAGAGSKDAKASNAGTARYFSEKDRVLVAQGVAGSVLD                          | 480 |
| XP_024671855.1 | SNEGQLVKAYRGMGSI AAMEDKKAGAGSKDSKASNAGTARYFSEKDRVLVAQGVAGSVLD                          | 480 |
| XP_022403647.1 | SNEGQLVKAYRGMGSI AAMEDKKAGAGSKDSKASNAGTARYFSEKDRVLVAQGVAGSVLD                          | 480 |
| XP_025403602.1 | SKEGQLVKAYRGMGSI AAMEDKKAGGDG---KASNAGTARYFSEKANVLVAQGVAGSVLD                          | 477 |
| XP_025435086.1 | SKEGQLVKAYRGMGSI AAMEDKKAGAGAKDSKASNAGTARYFSEKDSVLVAQGVAGSVLD                          | 480 |
| XP_025550436.1 | SKEGQLVKAYRGMGSI AAMEDKKAGAGAKDSKASNAGTARYFSEKDSVLVAQGVAGSVLD                          | 480 |
| XP_025436855.1 | SKEGQLVKAYRGMGSI AAMEDKKAGAGAKDSKASNAGTARYFSEKDSVLVAQGVAGSVLD                          | 480 |
| XP_025509000.1 | SKEGQLVKAYRGMGSI AAMEDKKAGAGAKDSKASNAGTARYFSEKDSVLVAQGVAGSVLD                          | 480 |
| XP_025490880.1 | SKEGQLVKAYRGMGSI AAMEDKKAGAGAKDSKASNAGTARYFSEKDSVLVAQGVAGSVLD                          | 390 |
| XP_025522930.1 | SKEGQLVKAYRGMGSI AAMEDKKAGAGAKDSKASNAGTARYFSEKDSVLVAQGVAGSVLD                          | 480 |
| XP_025451440.1 | SKEGQLVKAYRGMGSI AAMEDKKAGAGSKDSKASNAGTARYFSEKDGVLVAQGVAGSVLD                          | 390 |
| XP_001391892.2 | SKEGQLVKAYRGMGSI AAMEDKKAGAGSKDSKASNAGTARYFSEKDGVLVAQGVAGSVLD                          | 479 |
| XP_025560215.1 | SKEGQLVKS YRGMGSI AAMEDKKAGAGSKDSKASNAGTARYFSEKDGVLVAQGVAGSVLD                         | 390 |
| XP_025391094.1 | SKEGQLVKS YRGMGSI AAMEDKKAGAGSKDSKASNAGTARYFSEKDGVLVAQGVAGSVLD                         | 479 |
| XP_025510507.1 | SKEGQLVKS YRGMGSI AAMEDKKAGAGSKDSKASNAGTARYFSEKDGVLVAQGVAGSVLD                         | 479 |
| XP_025478868.1 | SKEGQLVKS YRGMGSI AAMEDKKAGAGSKDSKASNAGTARYFSEKDGVLVAQGVAGSVLD                         | 390 |
| XP_025464902.1 | SKEGQLVKAYRGMGSI AAMEDR KAGAGN KDSKASNAGTARYFSEKDSVLVAQGVAGSVLD                        | 419 |
| XP_025572109.1 | SKEGQLVKAYRGMGSI AAMEDR KAGAGSKDSKASNAGTARYFSEKDSVLVAQGVAGSVLD                         | 480 |
| XP_024700898.1 | SNEGQLVKAYRGMGSI AVMEDKKTGKAG---KAGNAGTARYFSEKDNVLVAQGVAGSVLD                          | 477 |
| XP_001218150.1 | SSEGQLVKAYRGMGSI AAMEDKKAAGAKDSKASNAGTARYFSEKSGVLVAQGVAGSVLD                           | 480 |
| XP_001823965.1 | SNEGQLVKAYRGMGSI AAMEDKKAGAGSKDSKASNAGTARYFSEKDRVLVAQGVAGSVLD                          | 480 |
| XP_022386829.1 | SNEGQLVKAYRGMGSI AAMEDKKAGAGSKDSKASNAGTARYFSEKDRVLVAQGVAGSVLD                          | 480 |
| XP_015408913.1 | SNEGQLVKAYRGMGSI AAMEDKKAGAGSKDSKASNAGTARYFSEKDRVLVAQGVAGSVLD                          | 480 |
| XP_001272822.1 | SNEGQLVKAYRGMGSI AAMEDKKAGAGN KDTKASNAGTARYFSEKDRVLVAQGVAGSVLD                         | 480 |
| XP_749494.1    | SNEGQLVKAYRGMGSI AAMEDKKAGAGSKDSKASNAGTARYFSEKDRVLVAQGVAGSVLD                          | 480 |
| XP_024686877.1 | SNEGQLVKAYRGMGSI AAMEDKKAGAGSKDSKASNAGTARYFSEKDRVLVAQGVAGSVLD                          | 480 |
| XP_001265922.1 | SNEGQLVKAYRGMGSI AAMEDKKAGAGSKDSKASNAGTARYFSEKDRVLVAQGVAGSVLD                          | 480 |
|                | * . ***** : ***** . *** : * : .                    ** . *****        ** : **** : ***** |     |
| XP_022581501.1 | RGSITKFPYPLITGVQHSLQDIGVRSIDALHEGVDNGTVRFEVRSASAMAEGNVHGLHSY                           | 527 |
| XP_024695056.1 | RGSVTKFIPYLVAGVQHSLQDIGVESLDALHKGVDDGGVVRFEVRSASAQTEGNVHGLHSY                          | 540 |
| XP_024671855.1 | RGSVTKFIPYLVAGVQHSLQDIGVESLDALHKGVDDGGVVRFEVRSASAMTEGNVHGLHSY                          | 540 |
| XP_022403647.1 | RGSVTKFIPYLVGTGIQHSLQDIGVKSLEAFHDGVDNEGTVRFEVRSASAQTEGNVHGLHSY                         | 540 |
| XP_025403602.1 | RGSITKFPYPLIAGVQHSLQDIGVTSLQALHDGVDNQGTVRFEVRSASAMTEGNVHGLHSY                          | 537 |
| XP_025435086.1 | RGSVTKFVPYLTAGIQHSLQDIGVQSLKALHDGVDNQGTVRFEVRSASAMAEGNVHGLHSY                          | 540 |
| XP_025550436.1 | RGSVTKFVPYLTAGVQHSLQDIGVKS LKDLHDGVDNQGKVRFEVRSASAMAEGNVHGLHSY                         | 540 |
| XP_025436855.1 | RGSVTKFVPYLTAGVQHSLQDIGVKS LKDLHDGVDNQGKVRFEVRSASAMTEGNVHGLHSY                         | 540 |
| XP_025509000.1 | RGSVTKFVPYLTAGVQHSLQDIGVKS LKDLHDGVDNQGKVRFEVRSASAMAEGNVHGLHSY                         | 540 |
| XP_025490880.1 | RGSVTKFVPYLTAGVQHSLQDIGVKS LKDLHDGVDNQGKVRFEVRSASAMAEGNVHGLHSY                         | 450 |
| XP_025522930.1 | RGSVTKFVPYLTAGVQHSLQDIGVKS LKDLHDGVDNQGKVRFEVRSASAMAEGNVHGLHSY                         | 540 |
| XP_025451440.1 | RGSVTKFVPYLVAGVQHSLQDIGVKS LKALHEGVDNGTVRFEVRSASAMAEGNVHGLHSY                          | 450 |
| XP_001391892.2 | RGSVTKFVPYLVAGVQHSLQDIGVKS LKALHEGVDNGTVRFEVRSASAMAEGNVHGLHSY                          | 539 |

|                |                                                                |     |
|----------------|----------------------------------------------------------------|-----|
| XP_025560215.1 | RGSVTKFVPYLVAGVQHSLQDIGVPSLKALHEGVNNGTVRFEMRSASAMAEGNVHGLHSY   | 450 |
| XP_025391094.1 | RGSVTKFVPYLVAGVQHSLQDIGVPSLKALHQGVNNGTVRFEMRSASAMAEGNVHGLHSY   | 539 |
| XP_025510507.1 | RGSVTKFVPYLVAGVQHSLQDIGVPSLKALHEGVNNGTVRFEMRSASAMAEGNVHGLHSY   | 539 |
| XP_025478868.1 | RGSVTKFVPYLVAGVQHSLQDIGVPSLKALHEGVNNGTVRFEMRSASAMAEGNVHGLHSY   | 450 |
| XP_025464902.1 | RGSITKFPYLVAGIQHSLQDIGVPSLQALHDGVNKGTVRFEMRSASAMAEGNVHGLHSY    | 479 |
| XP_025572109.1 | RGSITKFPYLVAGIQHSLQDIGVPSLQALHDGVNNGSVRFEMRSASAMAEGNVHGLHSY    | 540 |
| XP_024700898.1 | RGSVTKFIPYLVAGVQHSLQDIGVPSLEALHDGVNKGIVRFEMRSASASAQTEGNVHGLHSY | 537 |
| XP_001218150.1 | RGSVTKFIPYLVAGVQHSLQELGCRNLQELHDNVNKGIVRFEMRSASAMAEGNVHGLHSY   | 540 |
| XP_001823965.1 | RGSVTKFVPYLVAGVQHSLQDIGVQSLDALHEGVNNGTVRFEMRSASAMAEGNVHGLHSF   | 540 |
| XP_022386829.1 | RGSVTKFVPYLVAGVQHSLQDIGVQSLDALHEGVNNGTVRFEMRSASAMAEGNVHGLHSF   | 540 |
| XP_015408913.1 | RGSVTKFVPYLVAGVQHSLQDIGVQSLDALHEGVNNGTVRFEMRSASAMAEGNVHGLHSF   | 540 |
| XP_001272822.1 | RGSVTKFVPYLAAGVQHSLQDIGVKSLEALHDGVNKGIVRFEMRSASAMAEGNVHGLHSY   | 540 |
| XP_749494.1    | RGSVTKFVPYLVAGVQHSLQDIGVKSLEALHDGVNKGIVRFEMRSASAMAEGNVHGLHSY   | 540 |
| XP_024686877.1 | RGSVTKFIPYLVAGVQHSLQDIGVKSLEALHDGVNKGIVRFEMRSASAMAEGNVHGLHSY   | 540 |
| XP_001265922.1 | RGSVTKFVPYLVAGVQHSLQDIGVKSLEALHDGVNKGIVRFEMRSASAMAEGNVHGLHSY   | 540 |

\*\*\*:\*\*\*:\*\*\* :\*:\*\*\*\*\*:\* .:. :\*..\*: \* :\*\*\*:\*\*\*\*\* :\*\*\*\*\*:

|                |        |     |
|----------------|--------|-----|
| XP_022581501.1 | DKKLYV | 533 |
| XP_024695056.1 | DKKLYS | 546 |
| XP_024671855.1 | DKKLYS | 546 |
| XP_022403647.1 | DKKLYS | 546 |
| XP_025403602.1 | DKKLYA | 543 |
| XP_025435086.1 | DKKLYS | 546 |
| XP_025550436.1 | DKKLYS | 546 |
| XP_025436855.1 | DKKLYS | 546 |
| XP_025509000.1 | DKKLYS | 546 |
| XP_025490880.1 | DKKLYS | 456 |
| XP_025522930.1 | DKKLYS | 546 |
| XP_025451440.1 | DKKLYS | 456 |
| XP_001391892.2 | DKKLYS | 545 |
| XP_025560215.1 | DKKLYS | 456 |
| XP_025391094.1 | DKKLYS | 545 |
| XP_025510507.1 | DKKLYS | 545 |
| XP_025478868.1 | DKKLYS | 456 |
| XP_025464902.1 | DKKLYA | 485 |
| XP_025572109.1 | DKKLYA | 546 |
| XP_024700898.1 | DKKLYS | 543 |
| XP_001218150.1 | DKKLYA | 546 |
| XP_001823965.1 | DKKLYS | 546 |
| XP_022386829.1 | DKKLYS | 546 |
| XP_015408913.1 | DKKLYS | 546 |
| XP_001272822.1 | DKKLYS | 546 |
| XP_749494.1    | DKKLYS | 546 |
| XP_024686877.1 | DKKLYS | 546 |
| XP_001265922.1 | DKKLYS | 546 |

\*\*\*\*\*
